# Supplementary material
Source: PubMed Central journal article supplement (PMC3612635)
Supplement: 1215840110_pnas.201215840SI.pdf [file 1215840110_pnas.201215840SI.pdf]

# Supporting Information

DeFuria et al. 10.1073/pnas.1215840110

## SI Materials and Methods

**Flow Cytometry.** For T-cell phenotypic staining, blood leukocytes, splenocytes, or s.c. (inguinal) adipose tissue (AT) preparations were incubated with anti-mouse CD16/CD32 (eBioscience), LIVE/DEAD Fixable Aqua (Invitrogen), and the directly conjugated monoclonal antibodies FITC NK1.1, PE CD25, PerCP CD69, APC CD8, Efluor 780 CD4, and Pacific Blue CD3 for 30 min at 4 °C. For regulatory T cell (Treg) staining, cells were incubated with FITC CD3, PE CD25, PerCP CD8 (BioLegend), and Efluor 780 CD4 plus anti-mouse CD16/CD32 for 30 min on ice and then treated with Foxp3 fixation/permeabilization solution (eBioscience) for 4 h. Cells were washed twice with Foxp3 permeabilization buffer and then stained with anti-mouse Foxp3 (APC conjugate) in Foxp3 permeabilization buffer (30 min at room temperature) before analysis as above. All directly conjugated antibodies were from eBioscience unless mentioned otherwise. CD278 [inducible T cell costimulator (ICOS)] staining was performed with CD278 Pacific Blue (BioLegend) combined with other surface stains.

**FACS Sorting.** Freshly isolated splenocytes were washed with FACS buffer (PBS with 0.5% BSA and 2 mM EDTA), and were incubated with anti-mouse CD16/CD32 (eBioscience), LIVE/DEAD Fixable Aqua (Invitrogen), and the directly conjugated monoclonal antibodies B220 APC (Biolegend), CD21 Brilliant Violet 421 (Biolegend), and CD23 PE-Cy7 (Biolegend) for 30 min at 4 °C. Cells were washed twice with FACS buffer and sorted on a FACS Aria flow cytometer (BD Biosciences). All cells were stained at a concentration of  $1 \times 10^7$  cells per 100  $\mu$ L of staining mixture. For all sorts, doublets were excluded from the sorted population via gating discrimination using forward scatter area (FSC-A) and forward scatter height (FSC-H). Purity was verified by analyzing the sorted population on FACS Aria and was greater than 96% in all populations tested.

**Gene Expression.** Custom-designed SABioscience (Qiagen) 384-well RT-PCR array plates using proprietary primers were purchased for gene expression analysis. Target genes were normalized to the arithmetic mean of two housekeeping genes *Hprt* and *Rplp0*, unless otherwise noted, by the  $2^{-\Delta\Delta Ct}$ , and all data are reported as relative to the WT low-fat diet (LFD) control group.

**Immunohistochemistry and Histomorphometry.** Paraffin-fixed tissue sections were stained with the following antibodies:  $\alpha$ -mouse F4/80 (1:10,000; Cedarlane),  $\alpha$ -human CD4 (1:1,000; R&D Systems),  $\alpha$ -human CD8 (1:500; R&D Systems), or rat IgG control antibody (1:10,000) and counterstained with H&E. Adipocyte areas were quantified from H&E-stained 5- $\mu$ M sections with Image J (NIH) or Image Viewer/iScan Coreo Au (Ventana Medical Systems). Adipocyte cell number was calculated by the method of Bourgeois et al. (1). Liver steatosis was scored on a 1–4 clinical scale by multiple blinded observers.

**Whole Animal and Intact Tissue Studies.** Male mice on a C57BL/6J background were ordered from Jackson Laboratory and maintained on site in sterile cages or were bred in-house. Results from  $\mu$ MT (B cell–null, verified by absence of CD19<sup>+</sup> B cells in flow cytometry) mice bred in-house or at Jackson Laboratory were indistinguishable. Five-week-old mice were fed ad libitum with a high-fat diet (HFD) or LFD (60% or 10% calories from fat, respectively; Research Diets) for 16 wk unless otherwise indicated. HFD- and LFD-fed mice are designated obese and lean, respectively. For all measurements, results from multiple mice and at least two independent feedings were averaged. Fasts were for 6 h unless otherwise indicated. Glucose or insulin tolerance tests were performed by i.p. injection of 1 g/kg sterile D-glucose or 0.75 U/kg of Humilin, respectively, and monitoring of tail vein blood via glucometer. Fat and lean tissue was measured as a percentage of body fat with NMR. Respiratory exchange ratio, which indicates the metabolic fuel source as carbohydrate vs. fat, was measured in Oxymax metabolic cages for 24 h under fed and fasted conditions. Tissues for sectioning were immediately fixed in Z-Fix postharvest and then stored in PBS. Serum for cytokine analyses was collected in BD Microtainer tubes (BD Biosciences). Tissues for immune cell analysis were immediately processed per the main text. Antinuclear antibodies were measured as previously described (2). Serum from an MRL.lpr lupus mouse or a lean C57BL/6 mouse was used as a positive or negative control, respectively. Staining was scored in a blinded manner. Spontaneous leptin secretion from epididymal AT was quantified from supernatants collected following incubation of 30–100  $\mu$ g of the testis-distal tip of the epididymal AT pad in Hepes-buffered DMEM for 2 h and is expressed as nanograms per gram whole epididymal AT weight per mL media.

**Human Subjects/Samples.** Both type 2 diabetic (T2D) and non-T2D excluded individuals with common infections  $\leq 2$  wk before donation or those with non-T2D-related inflammatory or autoimmune disease. T2D patients were defined as (i) under the care of a Center for Diabetes provider; (ii) on one or more diabetes medications; and (iii) having a diagnosis of diabetes on the clinical problem list. All donors were nonsmokers. Study design was cross-sectional. The data cannot account for the effect of drugs taken by both cohorts, given the limited number of samples analyzed ( $n < 25$ ) coupled with the extensive list of drugs taken by obese/T2D individuals. Purified human immune cells were cocultured at ratios that approximated ratios in human blood (2 monocytes: 1 B cell: 12 T cells) at a total cellular concentration of  $10^6$ /mL.

**Statistics.** All data are shown as mean  $\pm$  SEM unless otherwise indicated. One-way, two-way, three-way, and repeated-measures ANOVAs were performed in conjunction with Tukey's honestly significant difference test using the *car* package in R (3, 4). The Student *t* test and Pearson's  $\chi^2$  test were also performed (4) (Graphpad Prism v5.0). Significance was set at  $P < 0.05$  unless otherwise noted.

1. Bourgeois F, Alexiu A, Lemonnier D (1983) Dietary-induced obesity: Effect of dietary fats on adipose tissue cellularity in mice. *Br J Nutr* 49(1):17–26.
2. Richez C, et al. (2010) IFN regulatory factor 5 is required for disease development in the Fc $\gamma$ RIIB<sup>-/-</sup>Yaa and Fc $\gamma$ RIIB<sup>-/-</sup> mouse models of systemic lupus erythematosus. *J Immunol* 184(2):796–806.

3. Fox J, Weisberg S (2011) *An {R} Companion to Applied Regression* (Sage, Thousand Oaks, CA), 2nd Ed.
4. R Development Core Team (2008) *R: A Language and Environment for Statistical Computing* (R Foundation for Statistical Computing, Vienna, Austria).

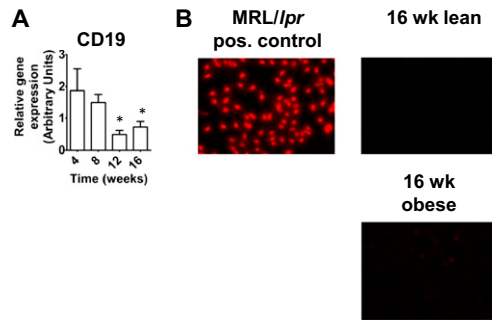

**Fig. S1.** (A) B cells infiltrate epididymal adipose tissue in response to obesity. RT-PCR quantitation of the B cell-specific mRNA CD19 over time, normalized to cyclophilin A mRNA and expressed as fold change in CD19 gene expression, in epididymal adipose tissue of lean mice fed a LFD for the same number of weeks that are indicated on the x axis. Value at 0-wk diet (i.e., when all mice are lean) = 1 by definition; thus, statistical comparison of 0 wk diet to results from mice fed HFD for 4–16 wk is not possible. Shown is mean and SD of measurements from four to eight individual mice, and  $*P < 0.05$  indicates difference from 4-wk mRNA levels. (B) Antinuclear antibody staining on Hep2 cells. Analysis of five or six lean or obese WT mice, respectively, from two independent feedings and two independent assays. All obese mouse serum samples were blindly scored as negative, whereas one of five lean mouse sera was marginally positive (+/- on a clinical scale of - to +++).

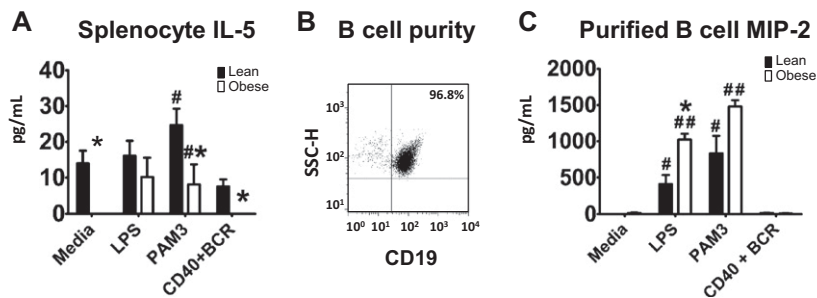

**Fig. S2.** (A) IL-5 in supernatants from total splenocytes from lean or obese mice, with cells stimulated as indicated. (B) Purity of splenic B-cell preparations reanalyzed by flow cytometry based on CD19 expression (x axis). One representative analysis shows >96% pure B cells. (C) Macrophage inflammatory 2 alpha (MIP-2) in supernatants from purified B cells with cells stimulated as indicated. For A and C,  $n = 6-8$  per group. Bars show mean and SEM. Significant differences are indicated by  $*P < 0.05$  in comparison of obese and lean animal results for the same stimulus;  $*P < 0.05$ ,  $##P < 0.01$ , stimulated compared with respective unstimulated (media) control with the same obesity status. In B, SSC-H designates side scatter height.



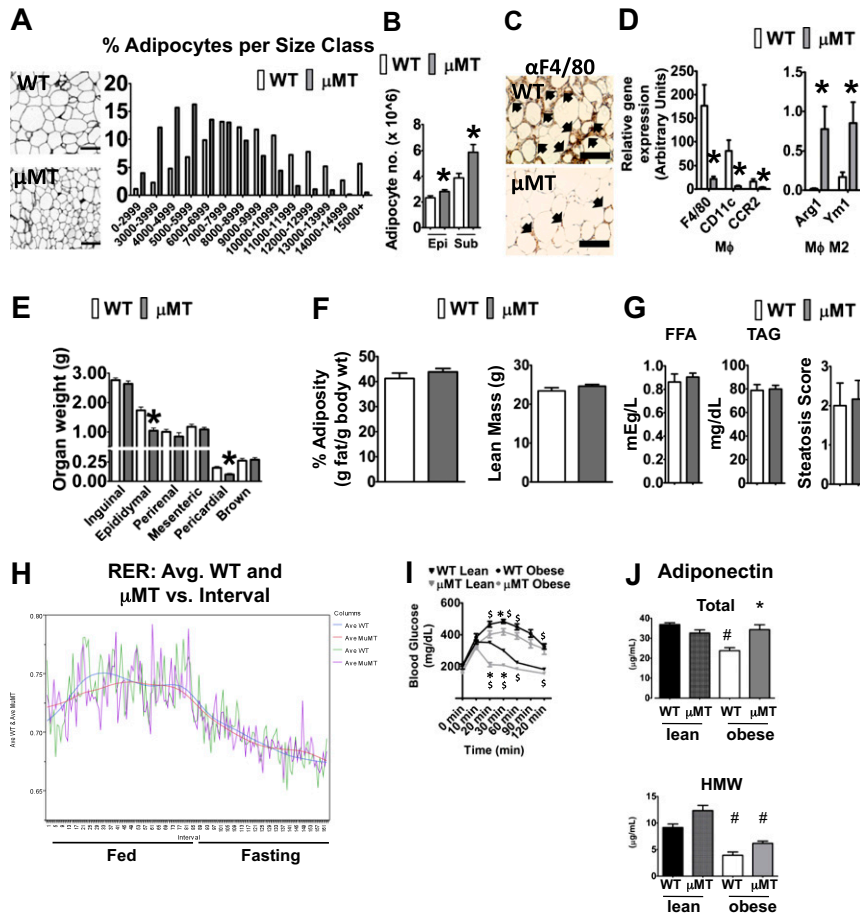

**Fig. S5.** B cells promote adipocyte hypertrophy. (A) H&E staining (*Left*) and the distribution of adipocyte area in s.c. (inguinal) AT. (Scale bar, 200 μm.) A–G are samples from obese mice on a HFD for 16 wk. (B) Adipocyte cell number in epididymal (epi) and s.c. (sub) white adipose tissue. Arrows pointing to brown dye indicate positively stained cells. (Scale bar, 200 μm.) (C) αF4/80 staining of WT and μMT adipose tissue. Arrows pointing to brown dye indicate positively stained cells. (Scale bar, 200 μm.) (D) Gene expression analysis of macrophage markers. (E) WT and μMT mice from depots as indicated. (F) NMR for whole animal adiposity or total lean mass in WT and μMT mice. (G) Fasting serum free fatty acids, fasting serum triglycerides, and hepatosteatosis scoring as indicated. (H) Respiratory exchange ratio (RER) analysis after 12 wk on HFD under fed or fasted conditions as indicated. Shown is mean of five μMT or six WT mice on 60% HFD, as absolute value or following curve fit analysis. Data from 45% HFD-fed animals, as well as  $VO_2$  and  $CO_2$ , are also similar between genotypes. (I) Glucose tolerance tests of lean WT (black triangles) and obese WT (black circles) and μMT (gray circles) mice after 8 wk on HFD. Analysis at 14-wk HFD gave similar results. (J) Total (*Upper*) or high molecular weight (HMW; *Lower*) fasting serum adiponectin in mice as indicated.  $n = 6-8$  for each panel unless otherwise indicated, and when appropriate, mean and SEM are shown. For B, D, and E, \*WT and μMT data are significantly different ( $P < 0.05$ ) by Student *t* test. For I, \* $P < 0.05$  indicates a significant difference for mice within the same diet group;  $^{\#}P < 0.05$  indicates a significant difference for mice within the same genotype, determined by two-way repeated-measures ANOVA. For J, \* $P < 0.05$  indicates WT and μMT data are significantly different within diet group;  $^{\#}P < 0.05$  indicates values from obese and lean mice are significantly different ( $P < 0.05$ ) within genotype as determined by Student *t* test.

### Regulatory T cell (Treg) gating strategy

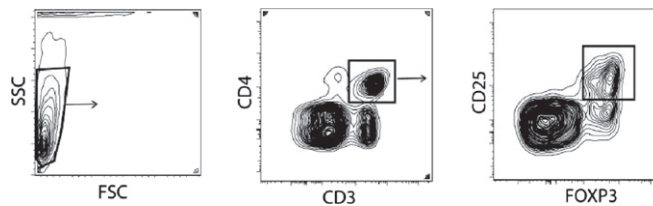

**Fig. S6.** Treg gating strategy. Tregs are identified as  $CD4^+CD3^+Foxp3^+CD25^+$  cells. SSC, side scatter. FSC, forward scatter.

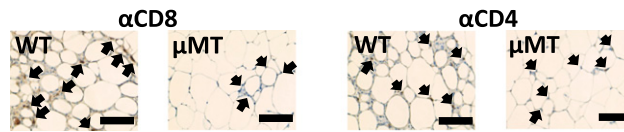

**Fig. S7.** Immunohistochemistry of CD8 and CD4 T cells in epididymal adipose tissue paraffin sections. Arrows pointing to brown dye indicate positively stained cells. (Scale bar, 200  $\mu\text{m}$ .)

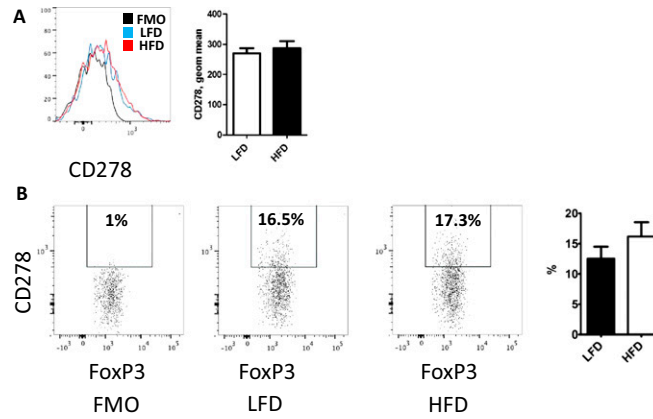

**Fig. S8.** Flow cytometry analysis of CD278<sup>+</sup> [inducible T cell costimulator (ICOS)<sup>+</sup>] Tregs from mouse spleen. Tregs were identified as CD3<sup>+</sup>CD4<sup>+</sup>CD25<sup>+</sup>Foxp3<sup>+</sup> with the gating strategy shown in Fig.S6. (A) Mean fluorescence intensity (MFI); representative samples from lean and obese mice are shown along with the bar graph.  $n = 3$ . (B) Percent CD278 positive Tregs,  $n = 3$ . FMO, fluorescence minus one, a negative control for CD278 staining.

#### Re-analysis of purified immune cells

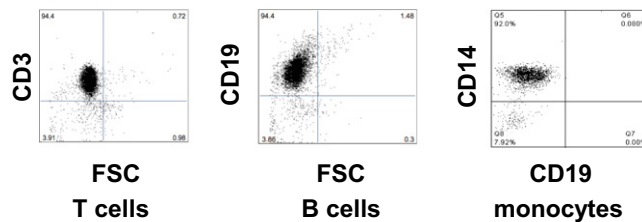

**Fig. S9.** Reanalysis of human blood immune cells for purity by flow cytometry based on CD3 (Left; FCS, forward scatter); CD19 (Center), and CD14<sup>+</sup>CD19<sup>-</sup> (Right). T cells were the major contaminant (<4%) in all B-cell and monocyte preparations.

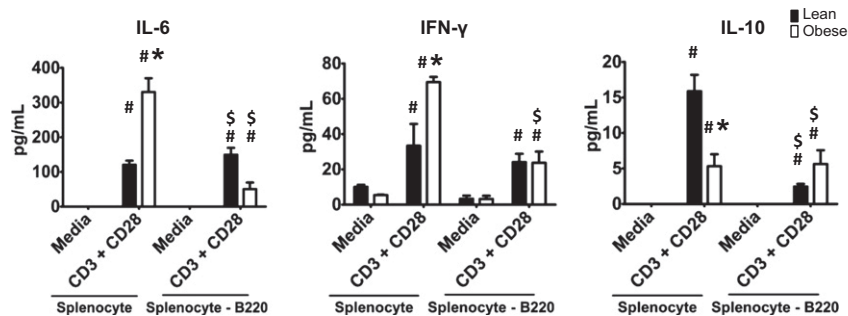

**Fig. S10.** Cytokine production by purified splenocytes plus or minus B220 B cells from lean and obese mice, plus or minus T cell-specific stimuli anti-CD3 + anti-CD28.  $n = 6$ . Bars show mean and SEM. Significantly different groups are indicated by \* $P < 0.05$  in comparison of obese and lean group for the same treatment; # $P < 0.05$  indicates stimulated compared with respective unstimulated (media) control within the same diet group; \$ $P < 0.05$  indicates splenocyte - B220 group in comparison with total splenocytes within the same diet group, calculated by two-way ANOVA.

**Table S1. Description of all blood donors**

|                          | Non-T2D median<br>(range) | T2D median<br>(range) |
|--------------------------|---------------------------|-----------------------|
| Age (y)                  | 43 (22–67)                | 56 (24–79)            |
| A1c (%)                  | 5.6 (4.3–5.8)             | 8 (6.0–10.6)*         |
| BMI (kg/m <sup>2</sup> ) | 33 (28–52)                | 34 (27–57)            |
| Glucose                  | 88 (62–109)               | 136 (63–292)*         |
|                          | <i>N</i> (22 total)       | <i>N</i> (19 total)   |
| Females                  | 19                        | 9 <sup>†</sup>        |
| Males                    | 3 <sup>‡</sup>            | 10                    |
| Race                     |                           |                       |
| White/non-Hispanic       | 9                         | 5                     |
| African American         | 8                         | 9                     |
| Hispanic                 | 5                         | 4                     |
| Asian                    | 0                         | 1                     |

A1c, hemoglobin A1c; BMI, body mass index.

\* $P < 0.05$  by Student *t* test.

<sup>†</sup> $P < 0.05$  between non-T2D and T2D within sex.

<sup>‡</sup> $P < 0.05$  between sex within non-T2D or T2D by  $\chi^2$  analysis.
